# Supplementary material for: Relative vaccine effectiveness against COVID-19 hospitalisation in persons aged ≥ 65 years: results from a VEBIS network, Europe, October 2021 to July 2023
Source: PubMed Central journal article supplement (PMC10905661; doi:10.2807/1560-7917.es.2024.29.1.2300670), 2024-01-04
Supplement: 23-00670_MONGE_Supplement.pdf [file 23-00670_MONGE_Supplement.pdf]

**Supplementary material for the article Relative vaccine effectiveness against COVID-19 hospitalisation in persons aged  $\geq 65$  years: results from a VEBIS network, Europe, October 2021 and July 2023**

This supplementary material is hosted by Eurosurveillance as supporting information alongside the article “Relative vaccine effectiveness against COVID-19 hospitalisation in persons aged  $\geq 65$  years: results from a VEBIS network, Europe, October 2021 and July 2023”, on behalf of the authors, who remain responsible for the accuracy and appropriateness of the content. The same standards for ethics, copyright, attributions and permissions as for the article apply. Supplements are not edited by Eurosurveillance and the journal is not responsible for the maintenance of any links or email addresses provided therein.

**Supplementary Table S1.** Date of COVID-19 vaccines roll-out by age group, number of booster doses, and study site

|             | ≥80                          |           |           |           | 65-79                        |           |           |           |
|-------------|------------------------------|-----------|-----------|-----------|------------------------------|-----------|-----------|-----------|
|             | Complete primary vaccination | Booster 1 | Booster 2 | Booster 3 | Complete primary vaccination | Booster 1 | Booster 2 | Booster 3 |
| Belgium     | 21.03.05                     | 21.09.22  | 22.07.20  | 22.09.12  | 21.03.21                     | 21.09.22  | 22.09.12  |           |
| Denmark     | 20.12.28                     | 21.10.18  | 22.09.15  |           | 21.03.15                     | 21.10.18  | 22.10.01  |           |
| Italy       | 21.02.01                     | 21.09.27  | 22.04.08  | 22.10.17  | 21.04.07                     | 21.10.08  | 22.07.11  | 22.10.17  |
| Luxembourg  | 21.01.27                     | 21.07.07  | 22.04.12  |           | 21.01.27                     | 21.11.08  | 22.07.14  |           |
| Navarre     | 21.03.02                     | 21.10.25  | 22.10.10  |           | 21.04.09                     | 21.10.25  | 22.10.10  |           |
| Netherlands | 21.02.04                     | 21.11.18  | 22.02.26  | 22.09.19  | 21.04.19                     | 21.12.12  | 22.03.26  | 22.10.10  |
| Norway      | 21.01.31                     | 21.10.05  | 22.06.29  | 23.03.24  | 21.03.07                     | 21.10.05  | 22.06.29  |           |
| Portugal    | 21.02.03                     | 21.10.11  | 22.05.16  | 22.09.06  | 21.03.30                     | 21.10.11  | 22.09.06  |           |

**Supplementary Table S2.** Number of hospitalisations and person-months by number of doses and time since the last dose in ≥80 years old, in overlapping observation intervals of 8 weeks in eight European Union/European Economic Area countries\*, October 2021-July-2023

| Observation period                   | Complete primary vaccination<br>≥24 weeks<br>(events / person-months) | Booster 1<br>(events / person-months)** |                             |                              | Booster 2<br>(events / person-months)*** |                        |           | Booster 3<br>(events / person-months)**** |             |           |
|--------------------------------------|-----------------------------------------------------------------------|-----------------------------------------|-----------------------------|------------------------------|------------------------------------------|------------------------|-----------|-------------------------------------------|-------------|-----------|
|                                      |                                                                       | ≤12 weeks                               | 12-24 weeks                 | ≥24 weeks                    | ≤12 weeks                                | 12-24 weeks            | ≥24 weeks | ≤12 weeks                                 | 12-24 weeks | ≥24 weeks |
| October 1 to November 25, 2021       | 652/<br>1,561,710<br>#¥0\$                                            | 37/<br>308,023<br>#¥0\$                 | -                           | -                            |                                          |                        |           |                                           |             |           |
| November 1 to December 26, 2021      | 751/<br>716,577<br>#¥0\$                                              | 180/<br>1,124,098<br>#¥0\$              | -                           | -                            |                                          |                        |           |                                           |             |           |
| December 1, 2021 to January 25, 2022 | 620/<br>262,137<br>#¥0\$                                              | 824/<br>1,723,447<br>#¥0\$              | 57/<br>23,375<br>#¥\$       | -                            |                                          |                        |           |                                           |             |           |
| January 1 to February 25, 2022       | 544/<br>148,921<br>#¥0\$                                              | 1136/<br>1,398,267<br>#¥0\$             | 802/<br>503,004<br>#¥0\$    | -                            |                                          |                        |           |                                           |             |           |
| February 1 to March 28, 2022         | 403/<br>119,361<br>#¥0\$                                              | 657/<br>599,117<br>#¥0\$                | 1877/<br>1,271,389<br>#¥0\$ | -                            |                                          |                        |           |                                           |             |           |
| March 1 to April 25, 2022            | 220/<br>95,555<br>#¥0\$                                               | 207/<br>154,349<br>#0\$                 | 1630/<br>1,553,327<br>#¥0\$ | 73/<br>51,465<br>#¥0\$       |                                          |                        |           |                                           |             |           |
| April 1 to May 26, 2022              | 175/<br>96,037<br>#¥0\$                                               | 44/<br>46,477<br>#0\$                   | 1039/<br>1,253,792<br>#¥0\$ | 514/<br>382,745<br>#¥0\$     | -                                        | -                      | -         | -                                         | -           | -         |
| May 1 to June 25, 2022               | 222/<br>102,836<br>#¥0\$                                              | 20/<br>21,941<br>\$                     | 368/<br>496,691<br>#¥0\$    | 1175/<br>1,112,868<br>#¥0\$  | -                                        | -                      | -         | -                                         | -           | -         |
| June 1 to July 26, 2022              | 177/<br>101,232<br>#¥0\$                                              | -                                       | 88/<br>94,915<br>#0\$       | 1477/<br>1,145,699<br>#¥0\$  | 123/<br>425,531<br>#\$                   | -                      | -         | -                                         | -           | -         |
| July 1 to August 25, 2022            | 96/<br>109,291<br>‡#0¥0\$                                             | 15/<br>42,839<br>\$                     | 44/<br>48,266<br>‡#0\$      | 1987/<br>1,915,079<br>#¥0\$  | 482/<br>1,319,768<br>#0\$                | -                      | -         | -                                         | -           | -         |
| August 1 to September 25, 2022       | 59/<br>108,984<br>‡#0¥0\$                                             | -                                       | -                           | 1149/<br>1,774,973<br>‡#¥0\$ | 327/<br>1,179,821<br>‡#0\$               | -                      | -         | -                                         | -           | -         |
| September 1 to October 26, 2022      | 55/<br>98,519<br>‡#0¥0\$                                              | -                                       | -                           | 811/<br>1,297,159<br>‡0¥0\$  | 201/<br>794,411<br>‡0\$                  | 80/<br>231,325<br>‡0\$ | -         | -                                         | -           | -         |

|                                       |                            |                     |                     |                               |                              |                               |                               |                        |                         |                         |
|---------------------------------------|----------------------------|---------------------|---------------------|-------------------------------|------------------------------|-------------------------------|-------------------------------|------------------------|-------------------------|-------------------------|
| October 1, 2022 to November 25, 2022  | 51/<br>90,233<br>‡#©¥&◇§   | -                   | -                   | 503/<br>801,165<br>‡#©¥&◇§    | 136/<br>772,923<br>‡◇§       | 195/<br>462,708<br>‡©◇§       | -                             | 167/<br>862,107<br>‡   | -                       | -                       |
| November 1, 2022 to December 26, 2022 | 71/<br>106,489<br>‡#©¥&◇§  | -                   | 15/<br>10,563<br>◇§ | 716/<br>454,074<br>‡#©¥&◇§    | 311/<br>645,324<br>‡¥&◇§     | 384/<br>320,165<br>‡©&◇§      | 160/<br>13,403<br>©&          | 644/<br>890,925<br>‡&§ | -                       | -                       |
| December 1, 2022 to January 25, 2023  | 204/<br>774,124<br>‡#©¥&◇§ | 27/<br>28,838<br>\$ | 77/<br>47,529<br>◇§ | 5308/<br>3,816,617<br>‡#©¥&◇§ | 925/<br>1,140,714<br>‡\$¥&◇§ | 1597/<br>1,210,923<br>‡\$©&◇§ | 2072/<br>1,307,792<br>‡\$©&§  | 813/<br>830,836<br>‡&§ | 175/<br>202,698<br>‡&§  | -                       |
| January 1 to February 25, 2023        | 109/<br>768,764<br>‡#©¥&◇§ | -                   | 21/<br>30,389<br>\$ | 2798/<br>3,785,857<br>‡#©¥&◇§ | 385/<br>767,408<br>‡\$¥&◇§   | 730/<br>1,357,076<br>‡\$&◇§   | 1431/<br>1,757,523<br>‡\$©&◇§ | 317/<br>504,094<br>‡&§ | 697/<br>822,392<br>‡&§  | -                       |
| February 1 to March 28, 2023          | 64/<br>764,927<br>‡#©¥&◇§  | -                   | -                   | 2126/<br>3,758,368<br>‡#©&◇§  | 115/<br>340,087<br>\$©       | 724/<br>1,406,235<br>‡\$©¥&◇§ | 1486/<br>2,126,074<br>‡\$©&◇§ | 149/<br>309,819<br>‡&§ | 1246/<br>987,494<br>‡&§ | 22/<br>881<br>‡&        |
| March 1 to April 25, 2023             | 52/<br>764,364<br>‡#§¥&◇§  | -                   | 15/<br>28,766<br>\$ | 2173/<br>3,772,920<br>‡#&◇§   | 56/<br>171,308<br>#§         | 880/<br>1,471,988<br>‡#§¥&◇§  | 1785/<br>2,562,022<br>‡\$&◇§  | 79/<br>156,023<br>‡&   | 931/<br>780,728<br>‡&§  | 290/<br>432,680<br>‡&◇§ |
| April 1 to May 26, 2023               | 32/<br>762,591<br>‡#§¥&◇§  | -                   | 16/<br>22,045<br>\$ | 1735/<br>3,794,387<br>‡#&◇§   | -                            | 371/<br>783,065<br>‡#§¥&◇§    | 1844/<br>3,449,472<br>‡#§¥&◇§ | 31/<br>101,406<br>‡◇   | 252/<br>448,270<br>‡&§  | 405/<br>866,889<br>‡&§  |
| May 1 to June 25, 2023                | 32/<br>757,364<br>‡#§¥&◇§  | -                   | -                   | 841/<br>3,607,036<br>‡\$&◇§   | -                            | 69/<br>308,667<br>\$          | 860/<br>2,981,306<br>‡\$¥&◇§  | 19/<br>102,924<br>‡◇   | 55/<br>261,970<br>‡\$§  | 241/<br>627,069<br>‡&§  |
| June 1 to July 26, 2023               | 23/<br>756,047<br>‡#§¥&◇§  | -                   | -                   | 419/<br>3,629,270<br>‡\$¥&◇§  | -                            | -                             | 479/<br>3,628,433<br>‡#¥&◇§   | -                      | -                       | 128/<br>504,708<br>‡&§  |

rVE = Relative Vaccine Effectiveness; CI = Confidence Interval

\*Site participation in the study according to the observation periods: Belgium (July 2022-July 2023), Denmark (October 2021-July 2023), Italy (December 2022-July 2023), Luxembourg (July 2022-March 2023), Navarre (Spain) (October 2021-July 2023), the Netherlands (November 2022-July 2023), Norway (October 2021-July 2023), and Portugal (October 2021-July 2023).

\*\*First booster rollout date by study site where it has been recommended: Belgium (September 2021), Denmark (October 2021), Italy (September 2021), Luxembourg (July 2021), Navarre (Spain) (October 2021), the Netherlands (November 2021), Norway (October 2021), and Portugal (October 2021).

\*\*\*Second booster rollout date by study site where it has been recommended: Belgium (July 2022), Denmark (September 2022), Italy (April 2022), Luxembourg (April 2022), Navarre (Spain) (October 2022), the Netherlands (February 2022), Norway (June 2022), and Portugal (May 2022).

\*\*\*\*Third booster rollout date by study site where it has been recommended: Belgium (September 2022), Italy (October 2022), the Netherlands (September 2022), Norway (March 2023), and Portugal (September 2022).

‡ Belgium reached 5 events and contributed to the estimate

# Denmark reached 5 events and contributed to the estimate

\$ Italy reached 5 events and contributed to the estimate

© Luxembourg reached 5 events and contributed to the estimate

¥ Navarre (Spain) reached 5 events and contributed to the estimate

& The Netherlands reached 5 events and contributed to the estimate

◇ Norway reached 5 events and contributed to the estimate

§ Portugal reached 5 events and contributed to the estimate

**Supplementary Table S3.** Number of hospitalisations and person-months by number of doses and time since the last dose in 65-79 years old, in overlapping observation intervals of 8 weeks in eight European Union/European Economic Area countries\*, October 2021-July-2023.

| Observation period                   | Complete primary vaccination ≥24 weeks (events / person-months) | Booster 1 (events / person-months)** |                             |                               | Booster 2 (events / person-months)*** |             |           | Booster 3 (events / person-months)**** |             |           |
|--------------------------------------|-----------------------------------------------------------------|--------------------------------------|-----------------------------|-------------------------------|---------------------------------------|-------------|-----------|----------------------------------------|-------------|-----------|
|                                      |                                                                 | ≤12 weeks                            | 12-24 weeks                 | >24 weeks                     | ≤12 weeks                             | 12-24 weeks | >24 weeks | ≤12 weeks                              | 12-24 weeks | >24 weeks |
| October 1 to November 25, 2021       | 769/<br>5,430,687<br>#¥∅\$                                      | -                                    | -                           | -                             |                                       |             |           |                                        |             |           |
| November 1 to December 26, 2021      | 1,141/<br>3,627,044<br>#¥∅\$                                    | 161/<br>1,196,736<br>#¥∅\$           | -                           | -                             |                                       |             |           |                                        |             |           |
| December 1, 2021 to January 25, 2022 | 766/<br>1,261,165<br>#¥∅\$                                      | 518/<br>3,594,550<br>#¥∅\$           | -                           | -                             |                                       |             |           |                                        |             |           |
| January 1 to February 25, 2022       | 515/<br>386,220<br>#¥∅\$                                        | 997/<br>4,724,908<br>#¥∅\$           | 432/<br>256,825<br>#¥∅\$    | -                             |                                       |             |           |                                        |             |           |
| February 1 to March 28, 2022         | 340/<br>266,654<br>#¥∅\$                                        | 941/<br>3,226,817<br>#¥∅\$           | 1028/<br>1,674,165<br>#¥∅\$ | -                             |                                       |             |           |                                        |             |           |
| March 1 to April 25, 2022            | 176/<br>206,324<br>#¥∅\$                                        | 248/<br>1,124,660<br>#∅\$            | 914/<br>3,440,274<br>#¥∅\$  | -                             |                                       |             |           |                                        |             |           |
| April 1 to May 26, 2022              | 70/<br>224,508<br>#¥∅\$                                         | 47/<br>197,431<br>#∅\$               | 773/<br>4,527,698<br>#¥∅\$  | 46/<br>132,006<br>∅\$         | -                                     | -           | -         | -                                      | -           | -         |
| May 1 to June 25, 2022               | 76/<br>263,982<br>#¥∅\$                                         | -                                    | 452/<br>2,988,196<br>#¥∅\$  | 459/<br>2,003,695<br>#¥∅\$    | -                                     | -           | -         | -                                      | -           | -         |
| June 1 to July 26, 2022              | 59/<br>303,450<br>#¥∅\$                                         | -                                    | 135/<br>756,136<br>#∅\$     | 1140/<br>4,130,625<br>#¥∅\$   | -                                     | -           | -         | -                                      | -           | -         |
| July 1 to August 25, 2022            | 41/<br>356,594<br>‡#∅¥∅\$                                       | -                                    | 86/<br>269,417<br>‡#∅∅\$    | 1846/<br>8,670,660<br>‡#∅¥∅\$ | -                                     | -           | -         | -                                      | -           | -         |
| August 1 to September 25, 2022       | 25/<br>370,298<br>‡#∅¥∅\$                                       | -                                    | -                           | 1132/<br>8,678,096<br>‡#∅¥∅\$ | 27/<br>177,640<br>∅                   | -           | -         | -                                      | -           | -         |
| September 1 to October 26, 2022      | 23/<br>345,006<br>‡#∅¥∅\$                                       | -                                    | -                           | 908/<br>6,655,844<br>‡#∅¥∅\$  | 47/<br>502,355<br>∅                   | -           | -         | -                                      | -           | -         |

|                                       |                                |                      |                            |                                   |                              |                                 |                                  |                        |                        |                        |
|---------------------------------------|--------------------------------|----------------------|----------------------------|-----------------------------------|------------------------------|---------------------------------|----------------------------------|------------------------|------------------------|------------------------|
| October 1, 2022 to November 25, 2022  | 25/<br>298,826<br>‡#©¥&◇\$     | -                    | -                          | 517/<br>3,640,592<br>‡#©¥&◇\$     | 131/<br>3,775,740<br>©◇\$    | -                               | -                                | -                      | -                      | -                      |
| November 1, 2022 to December 26, 2022 | 45/<br>344,948<br>‡#©¥&◇\$     | -                    | -                          | 732/<br>1,914,955<br>‡#©¥&◇\$     | 415/<br>3,970,769<br>‡#¥&◇\$ | 249/<br>281,285<br>©&◇          | 108/<br>9,377<br>&               | 374/<br>66,422<br>&    | -                      | -                      |
| December 1, 2022 to January 25, 2023  | 90/<br>1,694,435<br>‡#©¥&◇\$   | 24/<br>90,719<br>#\$ | 65/<br>127,341<br>\$◇      | 4101/<br>10,990,371<br>‡#©¥&◇\$   | 797/<br>4,991,484<br>‡#©&◇\$ | 1106/<br>2,454,579<br>\$©&◇\$   | 481/<br>387,445<br>\$&           | 454/<br>194,097<br>\$& | 90/<br>12,734<br>&     | -                      |
| January 1 to February 25, 2023        | 56/<br>1,699,564<br>‡#©¥&◇\$   | -                    | 37/<br>102,722<br>\$&◇     | 2239/<br>10,813,752<br>‡#©¥&◇\$   | 322/<br>2,913,238<br>‡#©&◇\$ | 682/<br>5,068,885<br>‡#©&◇\$    | 512/<br>1,121,563<br>#\$\$&◇     | 200/<br>226,127<br>\$& | 326/<br>48,132<br>&    | -                      |
| February 1 to March 28, 2023          | 42/<br>1,696,136<br>‡#©¥&◇\$   | -                    | 30/<br>184,047<br>#\$\$&\$ | 1926/<br>10,756,367<br>‡#©¥&◇\$   | 124/<br>1,243,819<br>‡#©&◇\$ | 741/<br>5,807,923<br>‡#©¥&◇\$   | 677/<br>1,994,633<br>\$©&◇       | 82/<br>194,839<br>\$&  | 693/<br>139,058<br>\$& | -                      |
| March 1 to April 25, 2023             | 27/<br>1,703,449<br>‡#\$\$&◇\$ | -                    | 21/<br>184,786<br>#\$\$    | 1852/<br>10,800,531<br>‡#\$\$&◇\$ | 39/<br>468,487<br>\$         | 827/<br>5,786,667<br>‡#\$\$&◇\$ | 912/<br>4,040,830<br>‡#&◇\$      | 34/<br>131,369<br>\$&  | 562/<br>203,633<br>\$& | 101/<br>18,556<br>&    |
| April 1 to May 26, 2023               | 24/<br>1,710,882<br>‡#\$\$&◇\$ | -                    | -                          | 1495/<br>10,856,270<br>‡#\$\$&◇\$ | 15/<br>178,357<br>\$¥        | 346/<br>2,904,351<br>‡#\$\$&◇\$ | 1055/<br>7,462,232<br>‡#\$\$&◇\$ | -                      | 131/<br>221,847<br>\$& | 190/<br>54,252<br>&    |
| May 1 to June 25, 2023                | 16/<br>1,686,000<br>‡#\$\$&◇\$ | -                    | -                          | 797/<br>10,768,240<br>‡#¥&◇\$     | -                            | 77/<br>1,079,110<br>‡#◇\$       | 521/<br>7,877,285<br>‡#\$\$&◇\$  | -                      | 20/<br>176,794<br>\$   | 123/<br>153,493<br>\$& |
| June 1 to July 26, 2023               | 13/<br>1,692,300<br>‡#\$\$&◇\$ | -                    | -                          | 327/<br>10,254,502<br>‡#¥&◇\$     | -                            | -                               | 256/<br>6,533,779<br>‡#¥&◇\$     | -                      | -                      | 56/<br>239,879<br>\$&  |

rVE = Relative Vaccine Effectiveness; CI = Confidence Interval

\*Site participation in the study according to the observation periods: Belgium (July 2022-July 2023), Denmark (October 2021-July 2023), Italy (December 2022-July 2023), Luxembourg (July 2022-March 2023), Navarre (Spain) (October 2021-July 2023), the Netherlands (November 2022-July 2023), Norway (October 2021-July 2023), and Portugal (October 2021-July 2023).

\*\*First booster rollout date by study site where it has been recommended: Belgium (September 2021), Denmark (October 2021), Italy (October 2021), Luxembourg (November 2021), Navarre (Spain) (October 2021), the Netherlands (December 2021), Norway (October 2021), and Portugal (October 2021).

\*\*\*Second booster rollout date by study site where it has been recommended: Belgium (September 2022), Denmark (October 2022), Italy (July 2022), Luxembourg (July 2022), Navarre (Spain) (October 2022), the Netherlands (March 2022), Norway (June 2022), and Portugal (September 2022).

\*\*\*\*Third booster rollout date by study site where it has been recommended: Italy (not a formal recommendation by the authorities, but available to the age-group) (October 2022), and the Netherlands (October 2022).

‡ Belgium reached 5 events and contributed to the estimate

# Denmark reached 5 events and contributed to the estimate

\$ Italy reached 5 events and contributed to the estimate

© Luxembourg reached 5 events and contributed to the estimate

¥ Navarre (Spain) reached 5 events and contributed to the estimate

& The Netherlands reached 5 events and contributed to the estimate

◇ Norway reached 5 events and contributed to the estimate

\$ Portugal reached 5 events and contributed to the estimate

**Supplementary Figure S1.** Proportion of Omicron variant sublineages out of the SARS-CoV-2 samples sequenced by study site and epidemiological week throughout the study period (October'21-July'23)

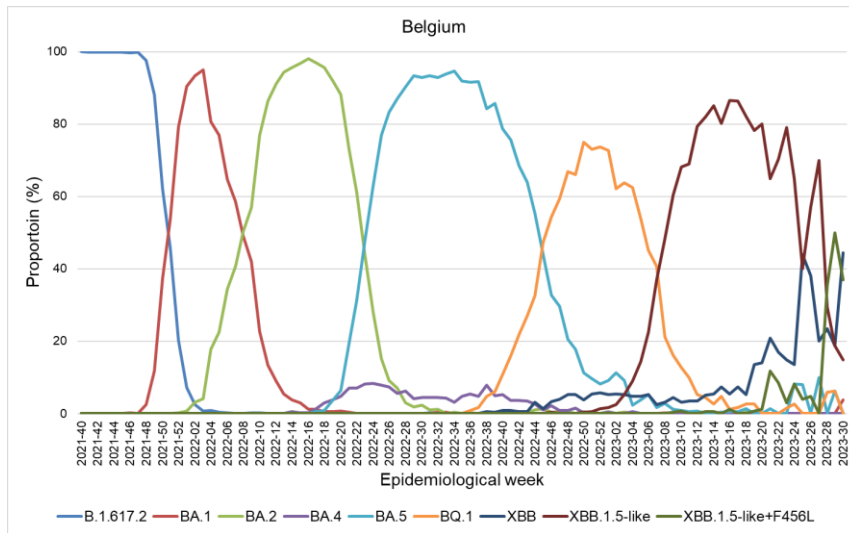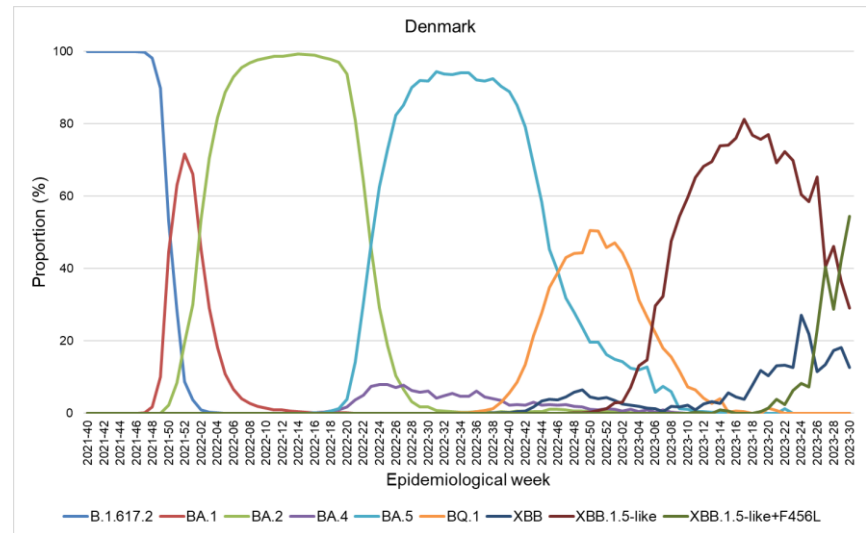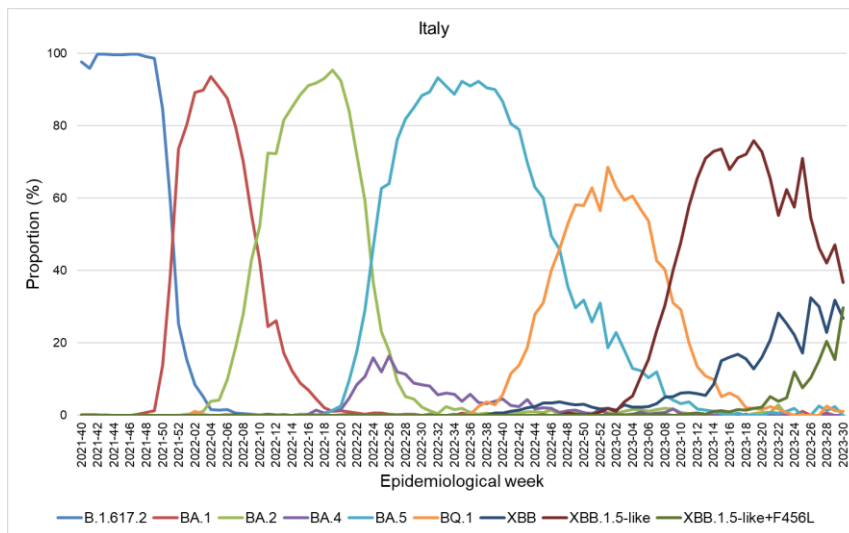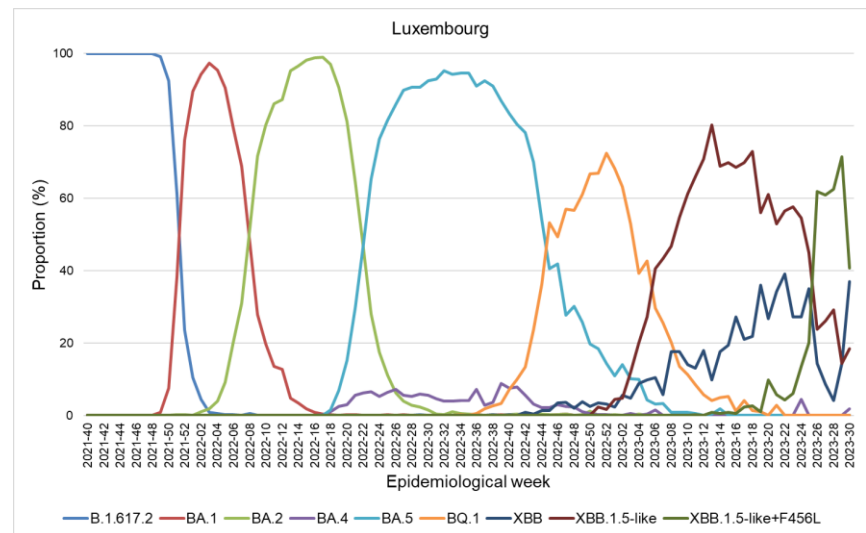

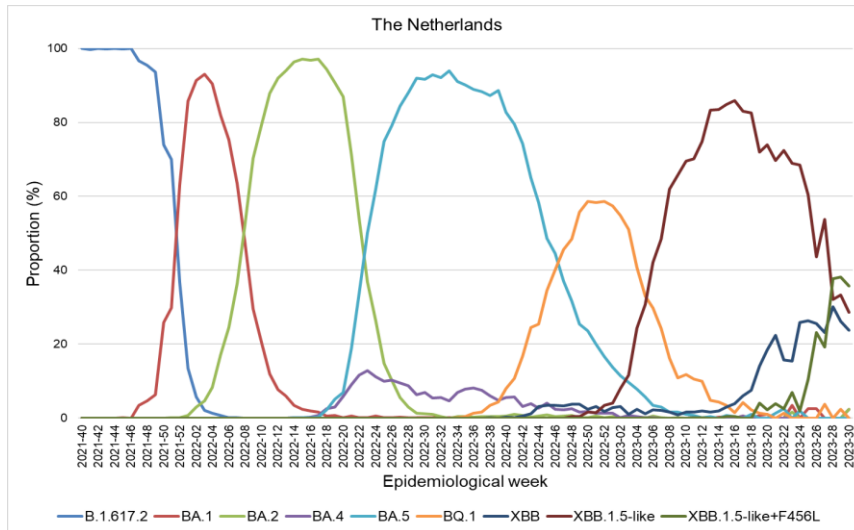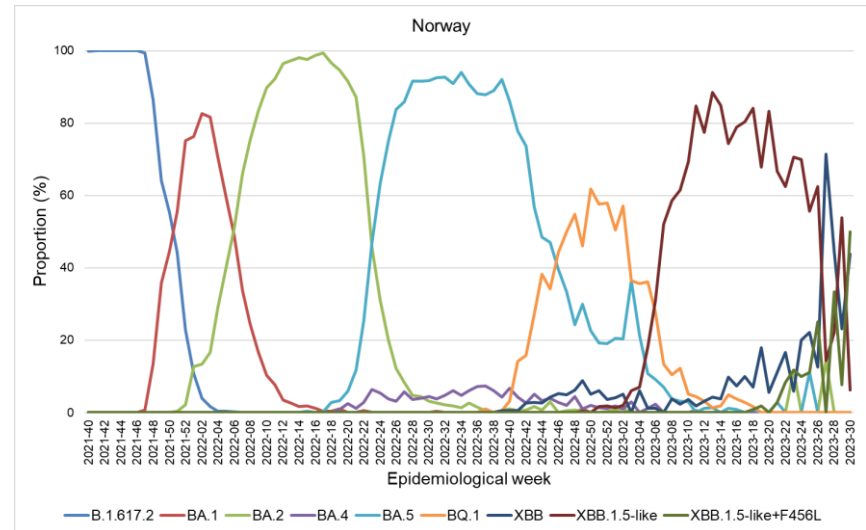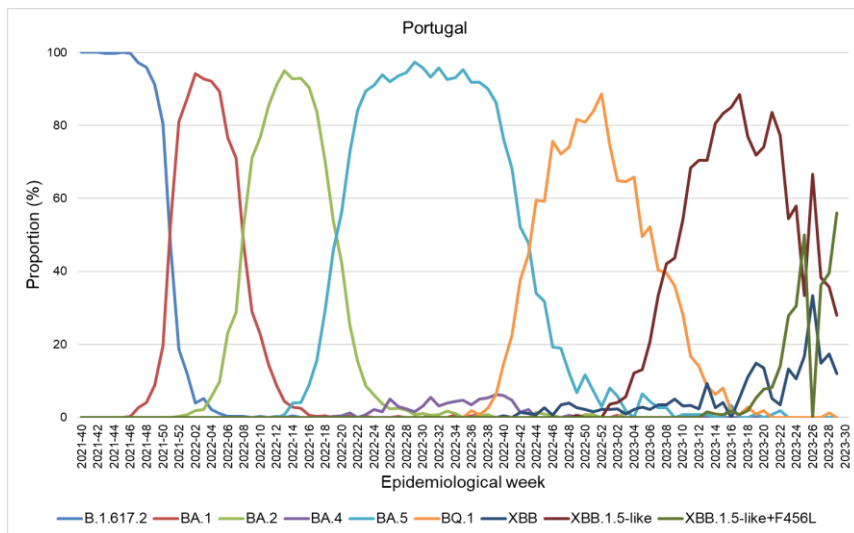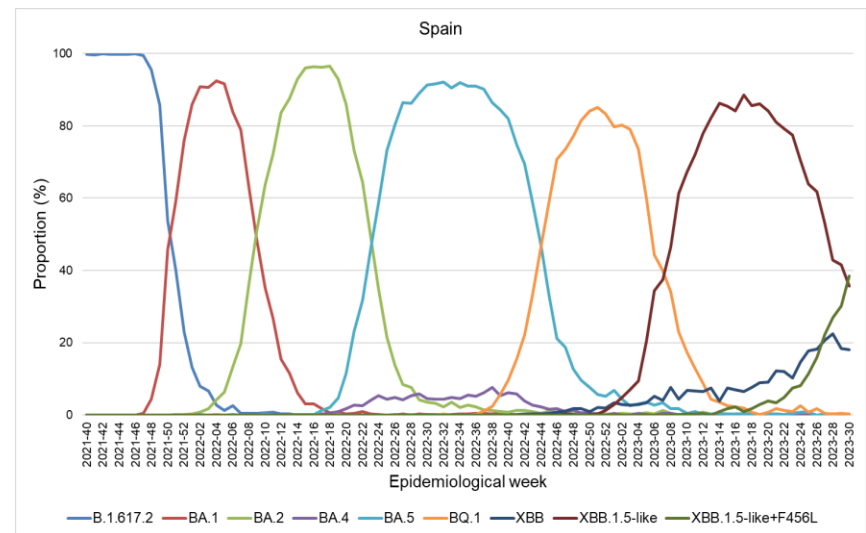

Source: European Centre for Disease Prevention and Control. Data on SARS-CoV-2 variants in the EU/EEA. (2023, November 17) [Internet]. 2023 [cited 2023 Dec 6]. Available from: <https://www.ecdc.europa.eu/en/publications-data/data-virus-variants-covid-19-eueea>
